# Supplementary material
Source: HighWire-hosted journal article supplement (http://www.jrheum.org/highwire/filestream/34139/field_highwire_adjunct_files/0/180203DataSuppl.pdf)
Supplement: 180203DataSuppl.pdf [file 180203DataSuppl.pdf]

## ONLINE SUPPLEMENTARY DATA

A Directed Acyclic Graph (DAG) is a graphic model that depicts a set of hypotheses about the causal process that generates a set of variables of interest. The intention is to minimise bias in empirical studies in epidemiology.

We considered the different exposure variables, and how they could potentially affect one another. This was plotted using the software on [www.dagitty.net](http://www.dagitty.net) with the following result (1).

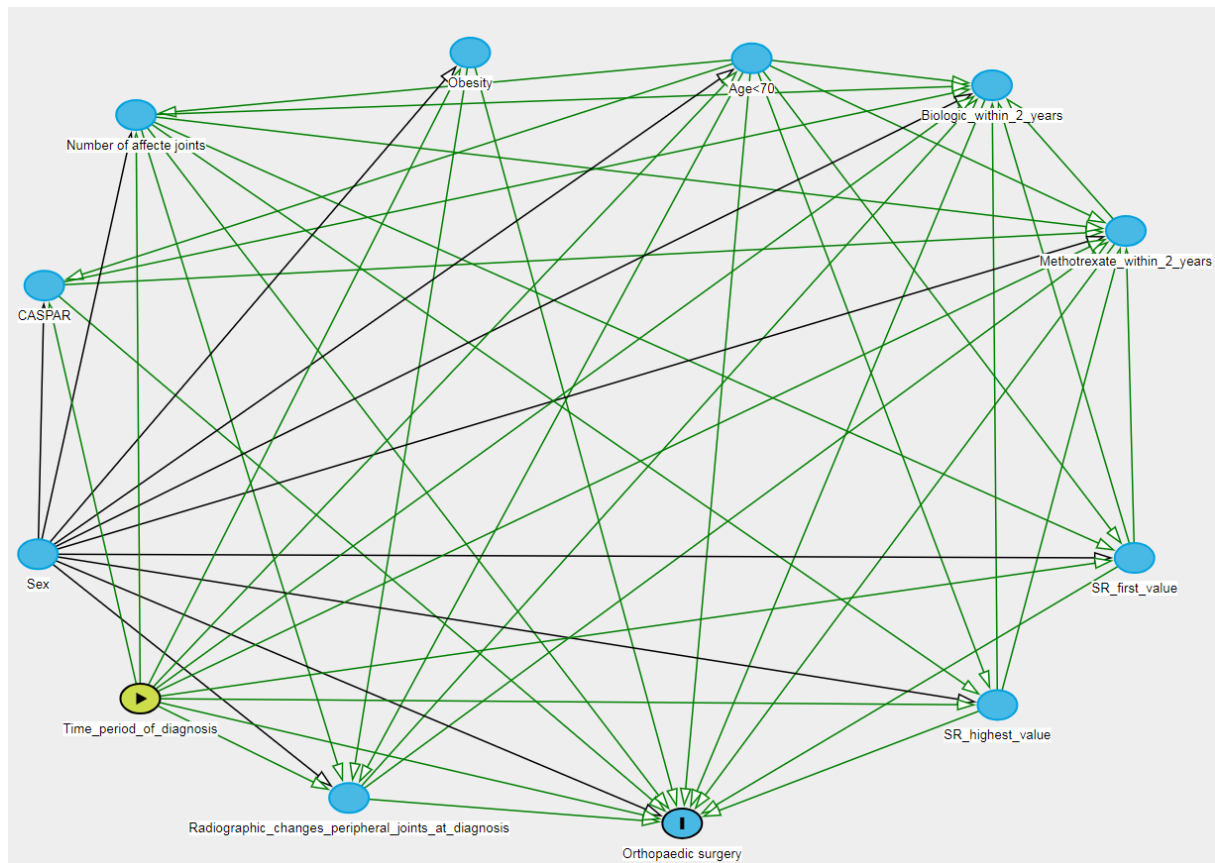

Orthopaedic surgery is the outcome variable. All included exposure variables may potentially affect this outcome. Arrows are drawn according to whether the exposure variables may have an effect on other exposure variables, and visualises causal paths and biasing paths. One may thus find potential biases and which other variables that needs to be included in the Cox regression analyses to minimise bias, for each variable. In example; for “Time period of diagnosis”, no adjustment is necessary to estimate the total effect.

The complete model code is included below.

## Model code

Age%3C70 1 @0.600,-0.114

Biologic\_within\_2\_years 1 @0.873,-0.084

CASPAR 1 @-0.071,0.243

Methotrexate\_within\_2\_years 1 @0.990,0.352

Number%20of%20affecte%20joints 1 @0.016,-0.025

Obesity 1 @0.333,-0.123

Orthopaedic%20surgery O @0.534,1.088

Radiographic\_changes\_peripheral\_joints\_at\_diagnosis 1 @0.218,1.048

SR\_first\_value 1 @0.963,0.671

SR\_highest\_value 1 @0.833,0.902

Sex 1 @-0.077,0.665

Time\_period\_of\_diagnosis 1 @0.020,0.892

Age%3C70 Biologic\_within\_2\_years CASPAR Methotrexate\_within\_2\_years

Number%20of%20affecte%20joints Orthopaedic%20surgery

Radiographic\_changes\_peripheral\_joints\_at\_diagnosis SR\_first\_value SR\_highest\_value

Biologic\_within\_2\_years Orthopaedic%20surgery

CASPAR Biologic\_within\_2\_years Methotrexate\_within\_2\_years Orthopaedic%20surgery

Methotrexate\_within\_2\_years Biologic\_within\_2\_years Orthopaedic%20surgery

Number%20of%20affecte%20joints Biologic\_within\_2\_years Methotrexate\_within\_2\_years

Orthopaedic%20surgery Radiographic\_changes\_peripheral\_joints\_at\_diagnosis SR\_first\_value

SR\_highest\_value

Obesity Orthopaedic%20surgery Radiographic\_changes\_peripheral\_joints\_at\_diagnosis

Radiographic\_changes\_peripheral\_joints\_at\_diagnosis Biologic\_within\_2\_years

Methotrexate\_within\_2\_years Orthopaedic%20surgery

SR\_first\_value Biologic\_within\_2\_years Methotrexate\_within\_2\_years Orthopaedic%20surgery

SR\_highest\_value Biologic\_within\_2\_years Methotrexate\_within\_2\_years Orthopaedic%20surgery

Sex Age%3C70 Biologic\_within\_2\_years CASPAR Methotrexate\_within\_2\_years

Number%20of%20affecte%20joints Obesity Orthopaedic%20surgery

Radiographic\_changes\_peripheral\_joints\_at\_diagnosis SR\_first\_value SR\_highest\_value

Time\_period\_of\_diagnosis Age%3C70 Biologic\_within\_2\_years CASPAR

Methotrexate\_within\_2\_years Number%20of%20affecte%20joints Obesity Orthopaedic%20surgery

Radiographic\_changes\_peripheral\_joints\_at\_diagnosis SR\_first\_value SR\_highest\_value

1. Textor J, van der Zander B, Gilthorpe MS, Liskiewicz M, Ellison GT. Robust causal inference using directed acyclic graphs: the R package 'dagitty'. *Int J Epidemiol*. 2016;45(6):1887-94.
